# Supplementary material
Source: publisher figshare collection journal article supplement (https://acs.figshare.com/ndownloader/files/3626454)
Supplement: Supplementary file 1 [file 3626454]

# **Supporting Information**

## **Photothermally Induced Optical Property Changes of Poly (*N*-isopropylacrylamide) Microgel-Based Etalons**

Molla R. Islam,<sup>\$</sup> Jessica Irvine, and Michael J. Serpe\*

Department of Chemistry, University of Alberta, Edmonton, AB, T6G 2G2

\*Corresponding Author: Michael J. Serpe ([michael.serpe@ualberta.ca](mailto:michael.serpe@ualberta.ca))

<sup>\$</sup> Current Address: Schmid College of Science and Technology, Chapman University,  
Orange, CA 92866

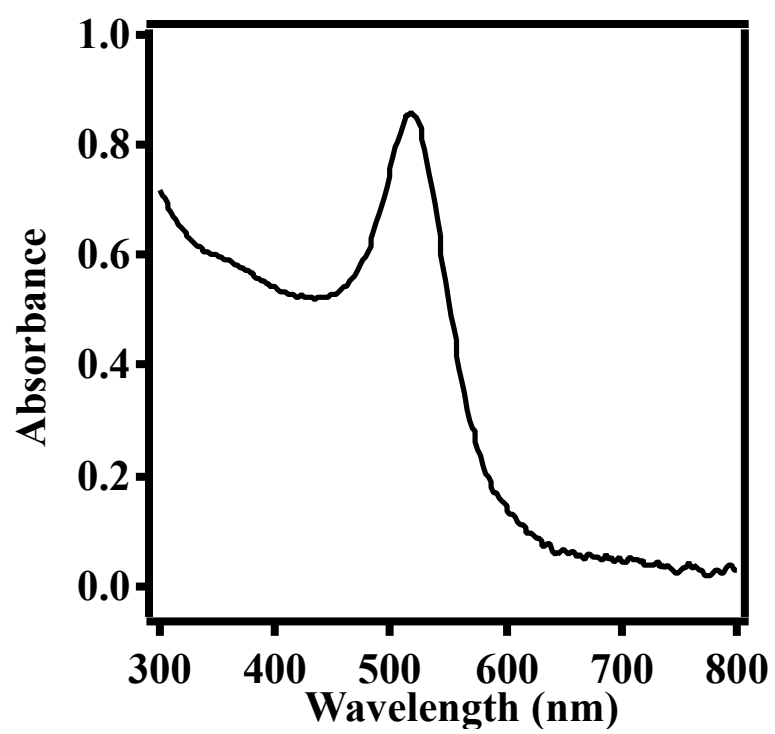

Fig. S1. UV-Vis spectrum of the AuNPs used in this study in solution.

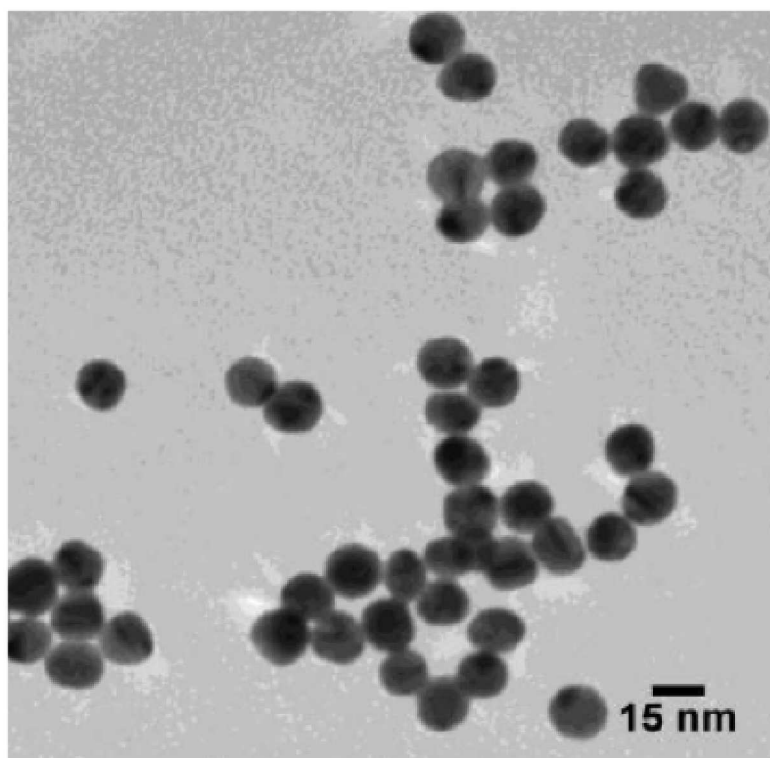

Fig. S2. Transmission electron microscope image of the AuNPs used in this study.
